# Supplementary material for: Human N-acetyltransferase 2 (NAT2) gene variability in Brazilian populations from different geographical areas
Source: Front Pharmacol. 2023 Nov 15;14:1278720. doi: 10.3389/fphar.2023.1278720 (PMC10684696; doi:10.3389/fphar.2023.1278720)
Supplement: Supplementary file 1 [file Table2.XLSX]

## Sheet: Planilha1
Supplementary Table S2: Distribution of NAT2 alleles
City /State	Brazilian Region	NAT2 alleles
(N° of individuals)		*4		*5A		*5B		*5C		*5D		*5G		*5J		*5N		*5T		*5AA		*5BA		*5BB		*5CA		*6A		*6F		*6H		*6N		*6O		*6P		*7A		*7B		*7C		*11A		*12A
		N	Frequency	N	Frequency	N	Frequency	N	Frequency	N	Frequency	N	Frequency	N	Frequency	N	Frequency	N	Frequency	N	Frequency	N	Frequency	N	Frequency	N	Frequency	N	Frequency	N	Frequency	N	Frequency	N	Frequency	N	Frequency	N	Frequency	N	Frequency	N	Frequency	N	Frequency	N	Frequency	N	Frequency
Porto Alegre - RS (239)	South	70	0.146	5	0.010	107	0.224	24	0.050	11	0.023	1	0.002	1	0.002	0	0.000	1	0.002	0	0.000	0	0.000	0	0.000	0	0.000	48	0.100	1	0.002	0	0.000	0	0.000	0	0.000	0	0.000	2	0.004	6	0.013	1	0.002	0	0.000	104	0.217
Curitiba - PR (9)	South	3	0.166	0	0.000	11	0.611	1	0.055	0	0.000	0	0.000	0	0.000	0	0.000	0	0.000	1	0.055	1	0.055	0	0.000	0	0.000	1	0.055	0	0.000	0	0.000	0	0.000	0	0.000	0	0.000	0	0.000	0	0.000	0	0.000	0	0.000	0	0.000
South (248)	South	73	0.147	5	0.010	118	0.238	25	0.050	11	0.022	1	0.002	1	0.002	0	0.000	1	0.002	1	0.002	1	0.002	0	0.000	0	0.000	49	0.099	1	0.002	0	0.000	0	0.000	0	0.000	0	0.000	2	0.004	6	0.012	1	0.002	0	0.000	104	0.210
Campos - RJ (57)	Southeast	18	0.158	2	0.017	41	0.360	4	0.035	1	0.009	0	0.000	0	0.000	0	0.000	0	0.000	0	0.000	2	0.017	0	0.000	0	0.000	22	0.193	0	0.000	0	0.000	0	0.000	2	0.017	1	0.009	0	0.000	3	0.026	0	0.000	0	0.000	9	0.079
Rio de Janeiro - RJ (209)	Southeast	76	0.181	4	0.009	139	0.332	7	0.017	0	0.000	0	0.000	0	0.000	0	0.000	0	0.000	1	0.002	3	0.007	0	0.000	1	0.002	56	0.134	0	0.000	1	0.002	0	0.000	2	0.005	1	0.002	0	0.000	18	0.043	0	0.000	0	0.000	13	0.030
RJ (266)	Southeast	94	0.176	6	0.012	180	0.338	11	0.021	1	0.002	0	0.000	0	0.000	0	0.000	0	0.000	1	0.002	5	0.009	0	0.000	1	0.002	78	0.187	0	0.000	1	0.002	0	0.000	4	0.007	2	0.004	0	0.000	21	0.039	0	0.000	0	0.000	22	0.040
Vitória - ES (69)	Southeast	40	0.289	1	0.007	47	0.340	3	0.022	0	0.000	0	0.000	0	0.000	0	0.000	0	0.000	0	0.000	0	0.000	0	0.000	0	0.000	29	0.210	0	0.000	0	0.000	0	0.000	0	0.000	0	0.000	0	0.000	5	0.036	0	0.000	1	0.007	1	0.007
Southeast - (335)	Southeast	134	0.200	7	0.010	227	0.338	14	0.021	1	0.001	0	0.000	0	0.000	0	0.000	0	0.000	1	0.001	5	0.007	0	0.000	1	0.001	107	0.160	0	0.000	1	0.001	0	0.000	4	0.006	2	0.003	0	0.000	26	0.039	0	0.000	1	0.002	23	0.034
Goiânia - GO (106)	Midwest	57	0.268	1	0.005	62	0.292	3	0.014	0	0.000	0	0.000	0	0.000	2	0.009	0	0.000	0	0.000	0	0.000	2	0.009	0	0.000	56	0.264	0	0.000	2	0.009	0	0.000	1	0.005	1	0.005	0	0.000	9	0.042	0	0.000	0	0.000	7	0.033
Midwest (106)	Midwest	57	0.268	1	0.005	62	0.292	3	0.014	0	0.000	0	0.000	0	0.000	2	0.009	0	0.000	0	0.000	0	0.000	2	0.009	0	0.000	56	0.264	0	0.000	2	0.009	0	0.000	1	0.005	1	0.005	0	0.000	9	0.042	0	0.000	0	0.000	7	0.033
Palmas - TO (27)	North	17	0.315	0	0.000	18	0.333	0	0.000	0	0.000	0	0.000	0	0.000	0	0.000	0	0.000	0	0.000	0	0.000	0	0.000	0	0.000	9	0.167	0	0.000	0	0.000	0	0.000	1	0.018	0	0.000	0	0.000	5	0.092	0	0.000	0	0.000	0	0.000
Gurupi - TO (44)	North	18	0.204	1	0.011	34	0.386	0	0.000	0	0.000	0	0.000	0	0.000	0	0.000	0	0.000	0	0.000	0	0.000	0	0.000	0	0.000	23	0.261	0	0.000	0	0.000	0	0.000	1	0.011	0	0.000	0	0.000	4	0.045	0	0.000	0	0.000	0	0.000
TO (71)	North	35	0.246	1	0.007	52	0.366	0	0.000	0	0.000	0	0.000	0	0.000	0	0.000	0	0.000	0	0.000	0	0.000	0	0.000	0	0.000	32	0.225	0	0.000	0	0.000	0	0.000	2	0.014	0	0.000	0	0.000	9	0.063	0	0.000	0	0.000	0	0.000
Porto Velho - RO (70)	North	34	0.242	22	0.157	16	0.114	3	0.021	3	0.021	0	0.000	0	0.000	0	0.000	0	0.000	0	0.000	0	0.000	0	0.000	0	0.000	30	0.214	0	0.000	1	0.007	2	0.014	1	0.007	0	0.000	1	0.007	13	0.093	0	0.000	1	0.007	1	0.007
Rio Branco - AC (48)	North	26	0.270	2	0.021	35	0.364	3	0.031	0	0.000	0	0.000	0	0.000	1	0.010	0	0.000	0	0.000	0	0.000	0	0.000	0	0.000	12	0.125	0	0.000	2	0.021	0	0.000	0	0.000	0	0.000	0	0.000	6	0.062	0	0.000	0	0.000	4	0.042
North (189)	North	95	0.251	25	0.066	103	0.272	6	0.016	3	0.008	0	0.000	0	0.000	1	0.003	0	0.000	0	0.000	0	0.000	0	0.000	0	0.000	74	0.196	0	0.000	3	0.008	2	0.005	3	0.008	0	0.000	1	0.003	28	0.074	0	0.000	1	0.003	5	0.013
Recife - PE (51)	Northeast	22	0.215	2	0.019	31	0.304	2	0.020	1	0.010	0	0.000	0	0.000	0	0.000	0	0.000	0	0.000	2	0.020	0	0.000	0	0.000	27	0.265	1	0.010	0	0.000	0	0.000	0	0.000	0	0.000	0	0.000	4	0.039	0	0.000	0	0.000	3	0.029
Natal - RN (27)	Northeast	9	0.166	1	0.018	19	0.352	3	0.055	0	0.000	0	0.000	0	0.000	0	0.000	0	0.000	0	0.000	0	0.000	0	0.000	0	0.000	15	0.278	0	0.000	0	0.000	0	0.000	0	0.000	0	0.000	0	0.000	4	0.074	0	0.000	1	0.018	0	0.000
Northeast (78)	Northeast	31	0.198	3	0.019	50	0.320	5	0.032	1	0.006	0	0.000	0	0.000	0	0.000	0	0.000	0	0.000	2	0.013	0	0.000	0	0.000	42	0.269	1	0.006	0	0.000	0	0.000	0	0.000	0	0.000	0	0.000	8	0.051	0	0.000	1	0.006	3	0.019
Total (956)	Brazil	390	0.204	41	0.021	560	0.293	53	0.028	16	0.008	1	0.0005	1	0.0005	3	0.001	1	0.0005	2	0.001	8	0.004	2	0.001	1	0.0005	328	0.171	2	0.001	6	0.003	2	0.001	8	0.004	3	0.002	3	0.002	77	0.040	1	0.0005	3	0.002	142	0.074
[truncated: 40 more columns]
