# Supplementary material for: Human N-acetyltransferase 2 (NAT2) gene variability in Brazilian populations from different geographical areas
Source: Front Pharmacol. 2023 Nov 15;14:1278720. doi: 10.3389/fphar.2023.1278720 (PMC10684696; doi:10.3389/fphar.2023.1278720)
Supplement: Supplementary file 2 [file Table3.XLSX]

## Sheet: Planilha1
Supplementary Table S3: Distribution of NAT2 genotypes
City /State	Brazilian Region	Genotypes
(N° of individuals)		*4/*4		*4/*5A		*4/*5B		*4/*5C		*4/*5D		*4/*5N		*4/*5AA		*4/*5BA		*4/*5CA		*4/*6A		*4/*6H		*4/*6N		*4/*6P		*4/*7B		*4/*12A		*4/*12C		*4/*12G		*4,*12S		*4/*13A		*4/*13D		*4/*13H		*4/*14A		*4/*14B		*5A/*5A
		N	Frequency	N	Frequency	N	Frequency	N	Frequency	N	Frequency	N	Frequency					N	Frequency	N	Frequency	N	Frequency	N	Frequency	N	Frequency	N	Frequency	N	Frequency	N	Frequency	N	Frequency	N	Frequency	N	Frequency	N	Frequency	N	Frequency	N	Frequency	N	Frequency	N	Frequency
Porto Alegre - RS (239)	South	16	0.067	0	0.000	3	0.012	0	0.000	6	0.025	0	0.000	0	0.000	0	0.000	0	0.000	3	0.012	0	0.000	0	0.000	0	0.000	1	0.004	1	0.004	0	0.000	0	0.000	0	0.000	24	0.100	0	0.000	0	0.000	0	0.000	0	0.000	1	0.004
Curitiba - PR (9)	South	0	0.000	0	0.000	3	0.333	0	0.000	0	0.000	0	0.000	0	0.000	0	0.000	0	0.000	0	0.000	0	0.000	0	0.000	0	0.000	0	0.000	0	0.000	0	0.000	0	0.000	0	0.000	0	0.000	0	0.000	0	0.000	0	0.000	0	0.000	0	0.000
South (248)	South	16	0.064	0	0.000	6	0.024	0	0.000	6	0.024	0	0.000	0	0.000	0	0.000	0	0.000	3	0.012	0	0.000	0	0.000	0	0.000	1	0.004	1	0.004	0	0.000	0	0.000	0	0.000	24	0.096	0	0.000	0	0.000	0	0.000	0	0.000	1	0.004
Campos - RJ (57)	Southeast	0	0.000	1	0.017	6	0.105	1	0.017	0	0.000	0	0.000	0	0.000	0	0.000	0	0.000	4	0.070	0	0.000	0	0.000	1	0.017	0	0.000	1	0.017	0	0.000	1	0.017	0	0.000	3	0.053	0	0.000	0	0.000	0	0.000	0	0.000	0	0.000
Rio de Janeiro - RJ (209)	Southeast	4	0.019	1	0.005	25	0.120	2	0.009	0	0.000	0	0.000	1	0.005	2	0.009	1	0.005	14	0.067	0	0.000	0	0.000	0	0.000	2	0.009	4	0.019	0	0.000	0	0.000	0	0.000	11	0.053	1	0.005	1	0.005	0	0.000	3	0.014	0	0.000
RJ (266)	Southeast	4	0.015	2	0.007	31	0.116	3	0.011	0	0.000	0	0.000	0	0.000	0	0.000	1	0.004	18	0.068	0	0.000	0	0.000	1	0.004	2	0.007	5	0.019	0	0.000	1	0.004	0	0.000	14	0.053	1	0.004	1	0.004	0	0.000	3	0.011	0	0.000
Vitória - ES (69)	Southeast	9	0.130	0	0.000	13	0.188	0	0.000	0	0.000	0	0.000	0	0.000	0	0.000	0	0.000	6	0.087	0	0.000	0	0.000	0	0.000	1	0.014	1	0.014	0	0.000	0	0.000	0	0.000	0	0.000	0	0.000	0	0.000	1	0.014	0	0.000	0	0.000
Southeast - (335)	Southeast	13	0.039	2	0.006	44	0.131	3	0.009	0	0.000	0	0.000	0	0.000	0	0.000	1	0.003	24	0.072	0	0.000	0	0.000	1	0.003	3	0.009	6	0.018	0	0.000	1	0.003	0	0.000	14	0.042	1	0.003	1	0.003	1	0.003	3	0.009	0	0.000
Goiânia - GO (106)	Midwest	9	0.085	0	0.000	17	0.160	2	0.019	0	0.000	0	0.000	0	0.000	0	0.000	0	0.000	15	0.141	0	0.000	0	0.000	0	0.000	2	0.019	2	0.019	0	0.000	0	0.000	0	0.000	0	0.000	0	0.000	0	0.000	0	0.000	1	0.009	0	0.000
Midwest (106)	Midwest	9	0.085	0	0.000	17	0.160	2	0.019	0	0.000	0	0.000	0	0.000	0	0.000	0	0.000	15	0.141	0	0.000	0	0.000	0	0.000	2	0.019	2	0.019	0	0.000	0	0.000	0	0.000	0	0.000	0	0.000	0	0.000	0	0.000	1	0.009	0	0.000
Palmas - TO (27)	North	3	0.111	0	0.000	5	0.185	0	0.000	0	0.000	0	0.000	0	0.000	0	0.000	0	0.000	2	0.074	0	0.000	0	0.000	0	0.000	1	0.037	0	0.000	0	0.000	0	0.000	0	0.000	0	0.000	0	0.000	0	0.000	0	0.000	3	0.111	0	0.000
Gurupi - TO (44)	North	2	0.045	0	0.000	8	0.182	0	0.000	0	0.000	0	0.000	0	0.000	0	0.000	0	0.000	4	0.088	0	0.000	0	0.000	0	0.000	0	0.000	0	0.000	1	0.023	0	0.000	0	0.000	1	0.023	0	0.000	0	0.000	0	0.000	0	0.000	0	0.000
TO (71)	North	5	0.070	0	0.000	13	0.183	0	0.000	0	0.000	0	0.000	0	0.000	0	0.000	0	0.000	6	0.084	0	0.000	0	0.000	0	0.000	1	0.014	0	0.000	1	0.014	0	0.000	0	0.000	1	0.014	0	0.000	0	0.000	0	0.000	3	0.042	0	0.000
Porto Velho - RO (70)	North	3	0.043	9	0.128	1	0.014	1	0.014	0	0.000	0	0.000	0	0.000	0	0.000	0	0.000	7	0.100	0	0.000	1	0.014	0	0.000	5	0.071	0	0.000	1	0.014	0	0.000	0	0.000	2	0.028	0	0.000	0	0.000	1	0.014	0	0.000	0	0.000
Rio Branco - AC (48)	North	4	0.083	1	0.020	5	0.104	0	0.000	0	0.000	1	0.020	0	0.000	0	0.000	0	0.000	7	0.146	1	0.020	0	0.000	0	0.000	0	0.000	2	0.041	0	0.000	0	0.000	0	0.000	0	0.000	0	0.000	0	0.000	0	0.000	1	0.020	0	0.000
North (189)	North	12	0.063	10	0.053	19	0.100	1	0.005	0	0.000	1	0.005	0	0.000	0	0.000	0	0.000	20	0.106	1	0.005	1	0.005	0	0.000	6	0.032	2	0.010	2	0.010	0	0.000	0	0.000	3	0.016	0	0.000	0	0.000	1	0.005	4	0.021	0	0.000
Recife - PE (51)	Northeast	4	0.078	1	0.020	7	0.137	1	0.002	0	0.000	0	0.000	0	0.000	0	0.000	0	0.000	4	0.078	0	0.000	0	0.000	0	0.000	0	0.000	0	0.000	0	0.000	0	0.000	1	0.020	0	0.000	0	0.000	0	0.000	0	0.000	0	0.000	0	0.000
Natal - RN (27)	Northeast	1	0.037	0	0.000	3	0.111	1	0.037	0	0.000	0	0.000	0	0.000	0	0.000	0	0.000	2	0.074	0	0.000	0	0.000	0	0.000	1	0.037	0	0.000	0	0.000	0	0.000	0	0.000	0	0.000	0	0.000	0	0.000	0	0.000	0	0.000	0	0.000
Northeast (78)	Northeast	5	0.064	1	0.013	10	0.128	2	0.025	0	0.000	0	0.000	0	0.000	0	0.000	0	0.000	6	0.077	0	0.000	0	0.000	0	0.000	1	0.013	0	0.000	0	0.000	0	0.000	1	0.013	0	0.000	0	0.000	0	0.000	0	0.000	0	0.000	0	0.000
Total (956)	Brazil	55	0.057	13	0.014	96	0.100	8	0.008	6	0.006	1	0.001	1	0.001	2	0.002	1	0.001	68	0.071	1	0.001	1	0.001	1	0.001	13	0.014	11	0.011	2	0.002	1	0.001	1	0.001	41	0.043	1	0.001	1	0.001	2	0.002	8	0.008	1	0.001
[truncated: 184 more columns]
