# Supplementary material for: Human N-acetyltransferase 2 (NAT2) gene variability in Brazilian populations from different geographical areas
Source: Front Pharmacol. 2023 Nov 15;14:1278720. doi: 10.3389/fphar.2023.1278720 (PMC10684696; doi:10.3389/fphar.2023.1278720)
Supplement: Supplementary file 3 [file Table4.XLSX]

## Sheet: Planilha1
Supplementary Table S4: Distribution of NAT2 phenotypes
City /State	Brazilian Region	Acetylation phenotypes
(N° of individuals)		Slow acetylators		Intermediate acetylators		Rapid acetylators		ND
		N	Frequency	N	Frequency	N	Frequency	N	Frequency
Porto Alegre - RS (239)	South	60	0.251	84	0.351	91	0.380	4	0.017
Curitiba - PR (9)	South	4	0.444	3	0.333	0	0.000	2	0.222
South (248)	South	64	0.258	87	0.351	91	0.367	6	0.024
Campos - RJ (57)	Southeast	25	0.438	21	0.368	4	0.070	7	0.123
Rio de Janeiro - RJ (209)	Southeast	68	0.325	88	0.421	30	0.143	23	0.110
RJ (266)	Southeast	93	0.349	109	0.410	34	0.128	30	0.113
Vitória - ES (69)	Southeast	31	0.449	26	0.377	10	0.145	2	0.029
Southeast - (335)	Southeast	124	0.370	135	0.403	44	0.131	32	0.095
Goiânia - GO (106)	Midwest	44	0.415	40	0.377	12	0.113	10	0.094
Midwest (106)	Midwest	44	0.415	40	0.377	12	0.113	10	0.094
Palmas - TO (27)	North	11	0.407	12	0.444	3	0.111	1	0.041
Gurupi - TO (44)	North	25	0.568	13	0.295	4	0.091	2	0.045
TO (71)	North	36	0.507	25	0.352	7	0.098	3	0.042
Porto Velho - RO (70)	North	30	0.428	29	0.414	6	0.086	5	0.071
Rio Branco - AC (48)	North	20	0.416	18	0.375	6	0.125	4	0.083
North (189)	North	86	0.455	72	0.381	19	0.100	12	0.063
Recife - PE (51)	Northeast	24	0.470	17	0.333	4	0.078	6	0.118
Natal - RN (27)	Northeast	16	0.592	10	0.370	1	0.037	0	0.000
Northeast (78)	Northeast	40	0.513	27	0.346	5	0.064	6	0.077
Total (956)	Brazil	358	0.374	361	0.378	171	0.178	66	0.069
