# Supplementary material for: Human N-acetyltransferase 2 (NAT2) gene variability in Brazilian populations from different geographical areas
Source: Front Pharmacol. 2023 Nov 15;14:1278720. doi: 10.3389/fphar.2023.1278720 (PMC10684696; doi:10.3389/fphar.2023.1278720)
Supplement: Supplementary file 4 [file Table1.XLSX]

## Sheet: Planilha1
Supplementary Table S1: Distribution of NAT2 SNPs
City /State	Brazilian Region	NAT2 SNPs
(N° of individuals)		C33A		A77C		C82T		G191A (rs1801279)		T195G		G255A		C282T (rs1041983)		T341C (rs1801280)		C345T (rs45532639)		C403G (rs12720065)		A472C (rs139351995)		C481T (rs1799929)		A518G		C578T (rs79050330)		G590A (rs1799930)		A600G (rs72466461)		G609T (rs45618543)		T622C (rs56387565)		C683T (rs45518335)		A766G (rs55700793)		A803G (rs1208)		G838A (rs56393504)		G857A (rs1799931)
		N	Frequency	N	Frequency	N	Frequency	N	Frequency	N	Frequency	N	Frequency	N	Frequency	N	Frequency	N	Frequency	N	Frequency	N	Frequency	N	Frequency	N	Frequency	N	Frequency	N	Frequency	N	Frequency	N	Frequency	N	Frequency	N	Frequency	N	Frequency	N	Frequency	N	Frequency	N	Frequency
Porto Alegre - RS (240)	South	0	0.000	0	0.000	0	0.000	0	0.000	0	0.000	0	0.000	146	0.304	153	0.319	0	0.000	0	0.000	0	0.000	126	0.262	0	0.000	0	0.000	50	0.104	0	0.000	0	0.000	0	0.000	0	0.000	0	0.000	293	0.610	0	0.000	11	0.023
Curitiba - PR (10)	South	1	0.050	0	0.000	3	0.150	0	0.000	0	0.000	0	0.000	3	0.150	14	0.700	0	0.000	0	0.000	0	0.000	13	0.650	0	0.000	1	0.050	1	0.050	0	0.000	0	0.000	0	0.000	0	0.000	0	0.000	14	0.700	0	0.000	1	0.050
South (250)	South	1	0.002	0	0.000	3	0.006	0	0.000	0	0.000	0	0.000	149	0.298	167	0.334	0	0.000	0	0.000	0	0.000	139	0.278	0	0.000	1	0.002	51	0.102	0	0.000	0	0.000	0	0.000	0	0.000	0	0.000	307	0.614	0	0.000	12	0.024
Campos - RJ (57)	Southeast	3	0.026	0	0.000	0	0.000	2	0.017	0	0.000	0	0.000	35	0.307	50	0.439	0	0.000	1	0.009	0	0.000	45	0.394	0	0.000	0	0.000	25	0.220	0	0.000	1	0.009	0	0.000	0	0.000	0	0.000	57	0.500	2	0.017	3	0.026
Rio de Janeiro - RJ (213)	Southeast	8	0.019	1	0.002	1	0.002	12	0.028	4	0.009	0	0.000	168	0.394	160	0.375	0	0.000	3	0.007	0	0.000	152	0.357	1	0.002	3	0.070	60	0.141	0	0.000	1	0.002	0	0.000	1	0.002	0	0.000	175	0.410	3	0.007	18	0.042
RJ (270)	Southeast	11	0.020	1	0.002	1	0.002	14	0.026	4	0.007	0	0.000	203	0.375	210	0.388	0	0.000	4	0.007	0	0.000	197	0.365	1	0.002	3	0.050	85	0.157	0	0.000	2	0.004	0	0.000	1	0.002	0	0.000	232	0.430	5	0.009	21	0.039
Vitória - ES (69)	Southeast	0	0.000	0	0.000	0	0.000	5	0.036	0	0.000	0	0.000	38	0.275	51	0.369	0	0.000	1	0.007	1	0.007	53	0.384	0	0.000	0	0.000	29	0.210	0	0.000	0	0.000	0	0.000	0	0.000	0	0.000	56	0.406	0	0.000	5	0.036
Southeast - (339)	Southeast	11	0.016	1	0.000	1	0.003	19	0.028	4	0.006	0	0.000	241	0.355	261	0.385	0	0.000	5	0.007	1	0.001	250	0.369	1	0.001	3	0.004	114	0.168	0	0.000	2	0.003	0	0.000	1	0.001	0	0.000	288	0.425	5	0.007	26	0.038
Goiânia - GO (106)	Midwest	0	0.000	0	0.000	0	0.000	5	0.023	0	0.000	1	0.005	69	0.325	70	0.330	2	0.001	1	0.005	2	0.009	67	0.316	0	0.000	0	0.000	60	0.283	1	0.005	1	0.005	0	0.000	0	0.000	2	0.009	77	0.363	0	0.000	9	0.042
Midwest (106)	Midwest	0	0.000	0	0.000	0	0.000	5	0.023	0	0.000	1	0.000	69	0.325	70	0.330	2	0.000	1	0.005	2	0.009	67	0.316	0	0.000	0	0.000	60	0.283	1	0.005	1	0.005	0	0.000	0	0.000	2	0.009	77	0.363	0	0.000	9	0.042
Palmas - TO (27)	North	0	0.000	0	0.000	0	0.000	3	0.055	0	0.000	0	0.000	19	0.352	18	0.333	0	0.000	0	0.000	0	0.000	18	0.333	0	0.000	0	0.000	10	0.185	0	0.000	0	0.000	0	0.000	0	0.000	0	0.000	19	0.351	1	0.020	5	0.092
Gurupi - TO (45)	North	1	0.011	0	0.000	0	0.000	2	0.022	1	0.011	0	0.000	34	0.377	35	0.388	0	0.000	1	0.001	0	0.000	37	0.411	0	0.000	0	0.000	26	0.288	0	0.000	0	0.000	0	0.000	0	0.000	0	0.000	37	0.411	1	0.011	4	0.044
TO (72)	North	1	0.007	0	0.000	0	0.000	5	0.035	1	0.007	0	0.000	53	0.368	53	0.368	0	0.000	1	0.007	0	0.000	55	0.382	0	0.000	0	0.000	36	0.250	0	0.000	0	0.000	0	0.000	0	0.000	0	0.000	56	0.389	2	0.014	9	0.062
Porto Velho - RO (70)	North	0	0.000	0	0.000	0	0.000	5	0.036	0	0.000	0	0.000	54	0.386	44	0.314	0	0.000	0	0.000	0	0.000	42	0.300	0	0.000	0	0.000	34	0.243	0	0.000	0	0.000	1	0.007	0	0.000	1	0.007	21	0.150	1	0.007	14	0.100
Rio Branco - AC (48)	North	0	0.000	0	0.000	0	0.000	2	0.021	0	0.000	0	0.000	24	0.250	41	0.427	0	0.000	0	0.000	1	0.010	38	0.396	0	0.000	0	0.000	14	0.146	0	0.000	1	0.010	0	0.000	0	0.000	2	0.021	44	0.458	0	0.000	5	0.052
North (190)	North	1	0.003	0	0.000	0	0.000	12	0.031	1	0.003	0	0.000	131	0.345	138	0.363	0	0.000	1	0.003	1	0.003	135	0.500	0	0.000	0	0.000	84	0.221	0	0.000	1	0.003	1	0.003	0	0.000	3	0.008	121	0.318	3	0.008	28	0.074
Recife - PE (52)	Northeast	3	0.029	0	0.000	0	0.000	2	0.019	0	0.000	1	0.001	36	0.346	39	0.375	0	0.000	1	0.001	0	0.000	37	0.356	0	0.000	1	0.010	29	0.279	0	0.000	0	0.000	0	0.000	0	0.000	0	0.000	43	0.413	0	0.000	4	0.038
Natal - RN (27)	Northeast	0	0.000	0	0.000	0	0.000	0	0.000	0	0.000	0	0.000	21	0.389	23	0.426	0	0.000	0	0.000	0	0.000	21	0.389	0	0.000	0	0.000	15	0.278	0	0.000	0	0.000	0	0.000	0	0.000	0	0.000	22	0.407	0	0.000	4	0.074
Northeast (79)	Northeast	3	0.019	0	0.000	0	0.000	2	0.013	0	0.000	1	0.006	57	0.360	62	0.392	0	0.000	1	0.006	0	0.000	58	0.367	0	0.000	1	0.060	44	0.278	0	0.000	0	0.000	0	0.000	0	0.000	0	0.000	65	0.411	0	0.000	8	0.051
Total (964)	Brazil	16	0.008	1	0.001	4	0.003	38	0.008	5	0.003	2	0.001	647	0.335	698	0.362	2	0.001	8	0.004	4	0.002	649	0.365	1	0.0005	5	0.003	353	0.183	1	0.0005	4	0.002	1	0.0005	1	0.0005	5	0.003	858	0.445	8	0.004	83	0.043
