# Supplementary material for: Human N-acetyltransferase 2 (NAT2) gene variability in Brazilian populations from different geographical areas
Source: Front Pharmacol. 2023 Nov 15;14:1278720. doi: 10.3389/fphar.2023.1278720 (PMC10684696; doi:10.3389/fphar.2023.1278720)
Supplement: Supplementary file 5 [file Table5.XLSX]

## Sheet: Table S5
Supplementary Table S5: NAT2 individual genotypes
Sample	State	Region	Genotype	Phenotype
01P-RO	Rondônia	North	*4,*5B	Intermediate
02P-RO	Rondônia	North	*5A,*7B	Slow
03P-RO	Rondônia	North	*4,*5A	Intermediate
04P-RO	Rondônia	North	*5B,*5B	Slow
05P-RO	Rondônia	North	*6A,*14B	Slow
06P-RO	Rondônia	North	*4,*14A	Intermediate
07P-RO	Rondônia	North	*5B,*6A	Slow
08P-RO	Rondônia	North	*5A,*6A	Slow
09P-RO	Rondônia	North	*4,*7B	Intermediate
10P-RO	Rondônia	North	*13A,*6A	Intermediate
11P-RO	Rondônia	North	*12A,*5B	Intermediate
12P-RO	Rondônia	North	*4,*4	Rapid
13P-RO	Rondônia	North	*4,*5A	Intermediate
14P-RO	Rondônia	North	*6A,*6A	Slow
15P-RO	Rondônia	North	*5A,*7B	Slow
16P-RO	Rondônia	North	*5B,*5B	Slow
17P-RO	Rondônia	North	*7A,*11A	Intermediate
18P-RO	Rondônia	North	*4,*5A	Intermediate
19P-RO	Rondônia	North	*5D,*13A	Intermediate
20P-RO	Rondônia	North	*4,*6A	Intermediate
21P-RO	Rondônia	North	*5B,*5B	Slow
22P-RO	Rondônia	North	*5A,*6A	Slow
23P-RO	Rondônia	North	*4,*6A	Intermediate
25P-RO	Rondônia	North	*4,*5A	Intermediate
26P-RO	Rondônia	North	*7B,*6A	Slow
27P-RO	Rondônia	North	*6A,*6A	Slow
30P-RO	Rondônia	North	*5B,*5B	Slow
31P-RO	Rondônia	North	*4,*7B	Intermediate
32P-RO	Rondônia	North	*4,*4	Rapid
33P-RO	Rondônia	North	*5A,*13A	Intermediate
34P-RO	Rondônia	North	*5A,*6A	Slow
35P-RO	Rondônia	North	*28,*6A	ND
36P-RO	Rondônia	North	*5A,*6A	Slow
37P-RO	Rondônia	North	*4,*6A	Intermediate
38P-RO	Rondônia	North	*4,*7B	Intermediate
39P-RO	Rondônia	North	*4,*5A	Intermediate
40P-RO	Rondônia	North	*5C,*6A	Slow
41P-RO	Rondônia	North	*4,*7B	Intermediate
42P-RO	Rondônia	North	*4,*5A	Intermediate
43P-RO	Rondônia	North	*5A,*6H	ND
44P-RO	Rondônia	North	*5A,*6O	ND
45P-RO	Rondônia	North	*4,*6A	Intermediate
46P-RO	Rondônia	North	*6A,*6A	Slow
47P-RO	Rondônia	North	*4,*5A	Intermediate
49P-RO	Rondônia	North	*4,*13A	Rapid
53P-RO	Rondônia	North	*4,*6A	Intermediate
54P-RO	Rondônia	North	*5A,*7B	Slow
56P-RO	Rondônia	North	*4,*12C	Rapid
58P-RO	Rondônia	North	*5B,*7B	Slow
59P-RO	Rondônia	North	*4,*6A	Intermediate
60P-RO	Rondônia	North	*5A,*6A	Slow
73P-RO	Rondônia	North	*4,*5C	Intermediate
74P-RO	Rondônia	North	*5A,*7B	Slow
76P-RO	Rondônia	North	*5D,*7B	ND
78P-RO	Rondônia	North	*4,*6N	ND
79P-RO	Rondônia	North	*4,*4	Rapid
80P-RO	Rondônia	North	*6A,*6A	Slow
81P-RO	Rondônia	North	*5B,*5B	Slow
82P-RO	Rondônia	North	*4,*5A	Intermediate
83P-RO	Rondônia	North	*14A,*14A	ND
85P-RO	Rondônia	North	*4,*13A	Rapid
86P-RO	Rondônia	North	*6A,*6A	Slow
87P-RO	Rondônia	North	*5B,*6A	Slow
89P-RO	Rondônia	North	*5A,*14B	Slow
90P-RO	Rondônia	North	*7B,*6A	Slow
91P-RO	Rondônia	North	*5D,*5C	Slow
92P-RO	Rondônia	North	*5B,*6N	ND
93P-RO	Rondônia	North	*4,*7B	Intermediate
94P-RO	Rondônia	North	*4,*6A	Intermediate
95P-RO	Rondônia	North	*4,*5A	Intermediate
1P-PA	Tocantins	North	*4,*4	Rapid
2P-PA	Tocantins	North	*4,*14B	Intermediate
3P-PA	Tocantins	North	*4,*6A	Intermediate
4P-PA	Tocantins	North	*5B,*6A	Slow
5P-PA	Tocantins	North	*4,*14B	Intermediate
6P-PA	Tocantins	North	*5B,*5B	Slow
7P-PA	Tocantins	North	*5B,*6A	Slow
8P-PA	Tocantins	North	*5B,*12B	Intermediate
9P-PA	Tocantins	North	*4,*5B	Intermediate
1C-PA	Tocantins	North	*4,*14B	Intermediate
2C-PA	Tocantins	North	*5B,*5B	Slow
3C-PA	Tocantins	North	*5B,*6O	ND
4C-PA	Tocantins	North	*5B,*5B	Slow
5C-PA	Tocantins	North	*5B,*7B	Slow
6C-PA	Tocantins	North	*4,*6A	Intermediate
7C-PA	Tocantins	North	*5B,*6A	Slow
8C-PA	Tocantins	North	*4,*4	Rapid
9C-PA	Tocantins	North	*7B,*6A	Slow
10C-PA	Tocantins	North	*4,*5B	Rapid
11C-PA	Tocantins	North	*4,*5B	Intermediate
12C-PA	Tocantins	North	*4,*5B	Intermediate
13C-PA	Tocantins	North	*6A,*6A	Slow
14C-PA	Tocantins	North	*4,*7B	Intermediate
15C-PA	Tocantins	North	*4,*5B	Intermediate
16C-PA	Tocantins	North	*4,*4	Rapid
17C-PA	Tocantins	North	*7B,*6A	Slow
18C-PA	Tocantins	North	*5B,*7B	Slow
1P-GU	Tocantins	North	*12H,*6A	ND
2P-GU	Tocantins	North	*4,*5B	Intermediate
3P-GU	Tocantins	North	*4,*6A	Intermediate
4P-GU	Tocantins	North	*4,*5B	Intermediate
5P-GU	Tocantins	North	*5B,*6A	Slow
6P-GU	Tocantins	North	*4,*13A	Rapid
7P-GU	Tocantins	North	*5B,*14B	Slow
9P-GU	Tocantins	North	*5B,*5B	Slow
10P-GU	Tocantins	North	*6A,*6A	Slow
11P-GU	Tocantins	North	*5B,*14B	Slow
12P-GU	Tocantins	North	*4,*5B	Intermediate
13P-GU	Tocantins	North	*4,*5B	Intermediate
14P-GU	Tocantins	North	*5B,*5B	Slow
15P-GU	Tocantins	North	*5B,*6A	Slow
1C-GU	Tocantins	North	*5B,*6A	Slow
2C-GU	Tocantins	North	*13A,*6A	Intermediate
3C-GU	Tocantins	North	*5B,*5B	Slow
4C-GU	Tocantins	North	*6A,*6A	Slow
5C-GU	Tocantins	North	*5B,*6A	Slow
6C-GU	Tocantins	North	*6O,*12S	ND
7C-GU	Tocantins	North	*4,*12C	Rapid
8C-GU	Tocantins	North	*4,*5B	Intermediate
9C-GU	Tocantins	North	*5B,*6A	Slow
10C-GU	Tocantins	North	*4,*4	Rapid
11C-GU	Tocantins	North	*5A,*5B	Slow
12C-GU	Tocantins	North	*4,*6A	Intermediate
13C-GU	Tocantins	North	*4,*4	Rapid
14C-GU	Tocantins	North	*6A,*6A	Slow
15C-GU	Tocantins	North	*5B,*5B	Slow
16C-GU	Tocantins	North	*4,*5B	Intermediate
17C-GU	Tocantins	North	*7B,*6A	Slow
18C-GU	Tocantins	North	*5B,*5B	Slow
19C-GU	Tocantins	North	*5B,*7B	Slow
20C-GU	Tocantins	North	*5B,*6A	Slow
21C-GU	Tocantins	North	*4,*5B	Intermediate
22C-GU	Tocantins	North	*5B,*5B	Slow
23C-GU	Tocantins	North	*7B,*6A	Slow
24C-GU	Tocantins	North	*5B,*5B	Slow
25C-GU	Tocantins	North	*5B,*7B	Slow
26C-GU	Tocantins	North	*5B,*6A	Slow
27C-GU	Tocantins	North	*4,*6A	Intermediate
28C-GU	Tocantins	North	*4,*5B	Intermediate
29C-GU	Tocantins	North	*6A,*6A	Slow
30C-GU	Tocantins	North	*4,*6A	Intermediate
01P-AC	Acre	North	*5B,*5B	Slow
02P-AC	Acre	North	*7B,*7B	Slow
03P-AC	Acre	North	*5B,*7B	Slow
04P-AC	Acre	North	*5B,*5B	Slow
05P-AC	Acre	North	*4,*6A	Intermediate
06P-AC	Acre	North	*4,*4	Rapid
07P-AC	Acre	North	*5B,*6A	Slow
08P-AC	Acre	North	*5B,*7B	Slow
09P-AC	Acre	North	*4,*5B	Intermediate
10P-AC	Acre	North	*5B,*5B	Slow
11P-AC	Acre	North	*5B,*6H	ND
12P-AC	Acre	North	*4,*5B	Intermediate
13P-AC	Acre	North	*4,*4	Rapid
14P-AC	Acre	North	*4,*5B	Intermediate
15P-AC	Acre	North	*5C,*7B	Slow
16P-AC	Acre	North	*4,*5N	ND
01C-AC	Acre	North	*4,*12A	Rapid
02C-AC	Acre	North	*4,*14B	Intermediate
03C-AC	Acre	North	*12A,*6A	Intermediate
04C-AC	Acre	North	*5B,*13A	Intermediate
05C-AC	Acre	North	*5B,*5B	Slow
06C-AC	Acre	North	*5B,*5B	Slow
07C-AC	Acre	North	*4,*5B	Intermediate
08CAC	Acre	North	*5C,*5B	Slow
09C-AC	Acre	North	*5B,*6A	Slow
10C-AC	Acre	North	*4,*6A	Intermediate
11C-AC	Acre	North	*4,*6H	ND
12C-AC	Acre	North	*5B,*5B	Slow
13C-AC	Acre	North	*4,*4	Rapid
14C-AC	Acre	North	*4,*5B	Intermediate
15C-AC	Acre	North	*4,*6A	Intermediate
16C-AC	Acre	North	*4,*5A	Intermediate
17C-AC	Acre	North	*12G,*5A	ND
18C-AC	Acre	North	*12A,*5B	Intermediate
19C-AC	Acre	North	*4,*6A	Intermediate
20C-AC	Acre	North	*4,*4	Rapid
21C-AC	Acre	North	*5B,*6A	Slow
22C-AC	Acre	North	*5B,*14B	Slow
23C-AC	Acre	North	*5C,*5B	Slow
24C-AC	Acre	North	*5B,*13A	Intermediate
25C-AC	Acre	North	*4,*6A	Intermediate
26C-AC	Acre	North	*5B,*6A	Slow
27C-AC	Acre	North	*4,*6A	Intermediate
28C-AC	Acre	North	*5B,*7B	Slow
29C-AC	Acre	North	*5B,*5B	Slow
30C-AC	Acre	North	*5B,*5B	Slow
31C-AC	Acre	North	*4,*12A	Rapid
32C-AC	Acre	North	*4,*6A	Intermediate
01P-RN	Rio Grande do Norte	Northeast	*5C,*5B	Slow
02P-RN	Rio Grande do Norte	Northeast	*5B,*6A	Slow
03P-RN	Rio Grande do Norte	Northeast	*5B,*13A	Intermediate
04P-RN	Rio Grande do Norte	Northeast	*4,*4	Rapid
05P-RN	Rio Grande do Norte	Northeast	*7B,*6A	Slow
06P-RN	Rio Grande do Norte	Northeast	*6A,*6A	Slow
07P-RN	Rio Grande do Norte	Northeast	*5C,*6A	Slow
08P-RN	Rio Grande do Norte	Northeast	*5A,*6A	Slow
09P-RN	Rio Grande do Norte	Northeast	*5B,*6A	Slow
01C-RN	Rio Grande do Norte	Northeast	*4,*6A	Intermediate
02C-RN	Rio Grande do Norte	Northeast	*4,*5B	Intermediate
03C-RN	Rio Grande do Norte	Northeast	*5B,*5B	Slow
04C-RN	Rio Grande do Norte	Northeast	*4,*6A	Intermediate
05C-RN	Rio Grande do Norte	Northeast	*5B,*6A	Slow
06C-RN	Rio Grande do Norte	Northeast	*5B,*5B	Slow
07C-RN	Rio Grande do Norte	Northeast	*4,*5B	Intermediate
08C-RN	Rio Grande do Norte	Northeast	*5B,*7B	Slow
09C-RN	Rio Grande do Norte	Northeast	*4,*5C	Intermediate
10C-RN	Rio Grande do Norte	Northeast	*6A,*6A	Slow
11C-RN	Rio Grande do Norte	Northeast	*5B,*6A	Slow
12C-RN	Rio Grande do Norte	Northeast	*4,*5B	Intermediate
13C-RN	Rio Grande do Norte	Northeast	*6A,*6A	Slow
14C-RN	Rio Grande do Norte	Northeast	*5B,*7B	Slow
15C-RN	Rio Grande do Norte	Northeast	*4,*7B	Intermediate
16C-RN	Rio Grande do Norte	Northeast	*11A,*5B	Intermediate
17C-RN	Rio Grande do Norte	Northeast	*5B,*5B	Slow
18C-RN	Rio Grande do Norte	Northeast	*5B,*13A	Rapid
1P-RE	Pernambuco	Northeast	*6A,*6A	Slow
2P-RE	Pernambuco	Northeast	*7B,*6A	Slow
3P-RE	Pernambuco	Northeast	*5B,*6A	Slow
4P-RE	Pernambuco	Northeast	*5B,*6A	Slow
5P-RE	Pernambuco	Northeast	*4,*5B	Intermediate
6P-RE	Pernambuco	Northeast	*4,*5B	Intermediate
7P-RE	Pernambuco	Northeast	*5B,*14B	Slow
8P-RE	Pernambuco	Northeast	*4,*6A	Intermediate
9P-RE	Pernambuco	Northeast	*6A,*6A	Slow
10P-RE	Pernambuco	Northeast	*5B,*5B	Slow
1C-RE	Pernambuco	Northeast	*12A,*6A	Intermediate
2C-RE	Pernambuco	Northeast	*5B,*14B	Intermediate
3C-RE	Pernambuco	Northeast	*5B,*6A	Slow
4C-RE	Pernambuco	Northeast	*5A,*6A	Slow
5C-RE	Pernambuco	Northeast	*4,*5B	Intermediate
6C-RE	Pernambuco	Northeast	*13A,*6A	Intermediate
7C-RE	Pernambuco	Northeast	*5B,*6A	Slow
8C-RE	Pernambuco	Northeast	*4,*5A	Intermediate
9C-RE	Pernambuco	Northeast	*5B,*6A	Slow
10C-RE	Pernambuco	Northeast	*5B,*6A	Slow
11C-RE	Pernambuco	Northeast	*5B,*7B	Slow
1	Pernambuco	Northeast	*5B,*6A	Slow
2	Pernambuco	Northeast	*5B,*6A	Slow
3	Pernambuco	Northeast	*4,*5B	Intermediate
4	Pernambuco	Northeast	*5B,*5B	Slow
5	Pernambuco	Northeast	*12H,*6A	ND
6	Pernambuco	Northeast	*4,*4	Rapid
7	Pernambuco	Northeast	*12A,*12E	ND
8	Pernambuco	Northeast	*5B,*6A	Slow
9	Pernambuco	Northeast	*6F,*5B	ND
10	Pernambuco	Northeast	*4,*6A	Intermediate
11	Pernambuco	Northeast	*12A,*6A	Intermediate
13	Pernambuco	Northeast	*4,*5C	Intermediate
14	Pernambuco	Northeast	*4,*5B	Intermediate
18	Pernambuco	Northeast	*4,*12S	ND
19	Pernambuco	Northeast	*4,*4	Rapid
26	Pernambuco	Northeast	*5D,*5BA	ND
27	Pernambuco	Northeast	*4,*4	Rapid
28	Pernambuco	Northeast	*4,*6A	Intermediate
29	Pernambuco	Northeast	*5B,*7B	Slow
30	Pernambuco	Northeast	*4,*4	Rapid
31	Pernambuco	Northeast	*5B,*13A	Intermediate
32	Pernambuco	Northeast	*4,*5B	Intermediate
35	Pernambuco	Northeast	*6A,*6A	Slow
34A	Pernambuco	Northeast	*5C,*5BA	ND
34B	Pernambuco	Northeast	*5B,*6A	Slow
FAZ	Pernambuco	Northeast	*5B,*5B	Slow
GSP	Pernambuco	Northeast	*4,*5B	Intermediate
MAFV	Pernambuco	Northeast	*5B,*5B	Slow
MCCB	Pernambuco	Northeast	*4,*6A	Intermediate
WFS	Pernambuco	Northeast	*7B,*6A	Slow
13G	Goiás	Midwest	*4,*6A	Intermediate
29G	Goiás	Midwest	*4,*6A	Intermediate
30G	Goiás	Midwest	*5B,*6A	Slow
32G	Goiás	Midwest	*12A,*12A	Rapid
35G	Goiás	Midwest	*5B,*5B	Slow
38G	Goiás	Midwest	*5B,*5B	Slow
39G	Goiás	Midwest	*12G,*7B	ND
40G	Goiás	Midwest	*4,*5B	Intermediate
41G	Goiás	Midwest	*6A,*6A	Slow
47G	Goiás	Midwest	*12A,*6A	Intermediate
49G	Goiás	Midwest	*7B,*6A	Slow
50G	Goiás	Midwest	*4,*5B	Intermediate
53G	Goiás	Midwest	*5B,*6A	Slow
54G	Goiás	Midwest	*5B,*5B	Slow
62G	Goiás	Midwest	*6A,*14A	Slow
63G	Goiás	Midwest	*7B,*14B	Slow
66G	Goiás	Midwest	*4,*6A	Intermediate
67G	Goiás	Midwest	*5B,*5B	Slow
73G	Goiás	Midwest	*4,*5B	Intermediate
75G	Goiás	Midwest	*6A,*6A	Slow
77G	Goiás	Midwest	*4,*12A	Rapid
78G	Goiás	Midwest	*4,*6A	Intermediate
82G	Goiás	Midwest	*6A,*6A	Slow
83G	Goiás	Midwest	*4,*7B	Intermediate
87G	Goiás	Midwest	*4,*4	Rapid
88G	Goiás	Midwest	*4,*5B	Intermediate
89G	Goiás	Midwest	*4,*6A	Intermediate
90G	Goiás	Midwest	*12A,*5BB	ND
91G	Goiás	Midwest	*4,*5C	Intermediate
94G	Goiás	Midwest	*4,*6A	Intermediate
98G	Goiás	Midwest	*5B,*6A	Slow
102G	Goiás	Midwest	*4,*5B	Intermediate
108G	Goiás	Midwest	*4,*5B	Intermediate
109G	Goiás	Midwest	*6A,*6A	Slow
111G	Goiás	Midwest	*5A,*6A	Slow
122G	Goiás	Midwest	*6A,*6A	Slow
125G	Goiás	Midwest	*4,*14B	Intermediate
130G	Goiás	Midwest	*4,*4	Rapid
134G	Goiás	Midwest	*6P,*13A	ND
135G	Goiás	Midwest	*4,*4	Rapid
136G	Goiás	Midwest	*4,*5B	Intermediate
137G	Goiás	Midwest	*7B,*6A	Slow
141G	Goiás	Midwest	*4,*5B	Intermediate
144G	Goiás	Midwest	*4,*5C	Intermediate
147G	Goiás	Midwest	*5B,*5B	Slow
149G	Goiás	Midwest	*4,*5B	Intermediate
152G	Goiás	Midwest	*6A,*6O	ND
153G	Goiás	Midwest	*4,*5B	Intermediate
154G	Goiás	Midwest	*6A,*6A	Slow
156G	Goiás	Midwest	*5B,*13A	Intermediate
157G	Goiás	Midwest	*4,*5B	Intermediate
161G	Goiás	Midwest	*4,*4	Rapid
163G	Goiás	Midwest	*5B,*14A	Slow
165G	Goiás	Midwest	*4,*5B	Intermediate
167G	Goiás	Midwest	*4,*6A	Intermediate
169G	Goiás	Midwest	*4,*4	Rapid
170G	Goiás	Midwest	*6A,*6A	Slow
171G	Goiás	Midwest	*5B,*6A	Slow
172G	Goiás	Midwest	*4,*6A	Intermediate
174G	Goiás	Midwest	*6A,*6H	ND
177G	Goiás	Midwest	*5B,*6A	Slow
178G	Goiás	Midwest	*6A,*6A	Slow
180G	Goiás	Midwest	*4,*4	Rapid
182G	Goiás	Midwest	*5B,*6A	Slow
183G	Goiás	Midwest	*4,*6A	Intermediate
186G	Goiás	Midwest	*4,*4	Rapid
187G	Goiás	Midwest	*4,*4	Rapid
188G	Goiás	Midwest	*5B,*5B	Slow
189G	Goiás	Midwest	*4,*6A	Intermediate
190G	Goiás	Midwest	*5B,*5N	ND
192G	Goiás	Midwest	*5B,*5B	Slow
198G	Goiás	Midwest	*5C,*5B	Slow
224G	Goiás	Midwest	*4,*5B	Intermediate
228G	Goiás	Midwest	*12A,*5B	Intermediate
229G	Goiás	Midwest	*4,*12A	Rapid
232G	Goiás	Midwest	*5B,*6A	Slow
235G	Goiás	Midwest	*4,*7B	Intermediate
236G	Goiás	Midwest	*4,*6A	Intermediate
237G	Goiás	Midwest	*6A,*6A	Slow
238G	Goiás	Midwest	*4,*5B	Intermediate
240G	Goiás	Midwest	*4,*5B	Intermediate
241G	Goiás	Midwest	*7B,*6A	Slow
258G	Goiás	Midwest	*5B,*6H	ND
302G	Goiás	Midwest	*5B,*14A	Slow
303G	Goiás	Midwest	*4,*5B	Intermediate
307G	Goiás	Midwest	*4,*6A	Intermediate
311G	Goiás	Midwest	*4,*6A	Intermediate
312G	Goiás	Midwest	*5BB,*6A	ND
313G	Goiás	Midwest	*5B,*5B	Slow
316G	Goiás	Midwest	*4,*4	Rapid
319G	Goiás	Midwest	*5B,*6A	Slow
323G	Goiás	Midwest	*5B,*5B	Slow
324G	Goiás	Midwest	*5B,*6A	Slow
325G	Goiás	Midwest	*5B,*6A	Slow
329G	Goiás	Midwest	*5B,*6A	Slow
334G	Goiás	Midwest	*4,*6A	Intermediate
335G	Goiás	Midwest	*5B,*5B	Slow
338G	Goiás	Midwest	*5B,*5B	Slow
348G	Goiás	Midwest	*4,*6A	Intermediate
349G	Goiás	Midwest	*5B,*5B	Slow
351G	Goiás	Midwest	*20,*6A	ND
355G	Goiás	Midwest	*5B,*6A	Slow
368G	Goiás	Midwest	*5B,*5N	ND
371G	Goiás	Midwest	*5B,*7B	Slow
372G	Goiás	Midwest	*4,*5B	Intermediate
374G	Goiás	Midwest	*7B,*6A	Slow
4559-RJ	Rio de Janeiro	Southeast	*5B,*6A	Slow
F01-RJ	Rio de Janeiro	Southeast	*5B,*6A	Slow
F02-RJ	Rio de Janeiro	Southeast	*5A,*6A	Slow
F03-RJ	Rio de Janeiro	Southeast	*13A,*14B	Slow
F04-RJ	Rio de Janeiro	Southeast	*5B,*13A	Intermediate
F05-RJ	Rio de Janeiro	Southeast	*13A,*6A	Intermediate
F06-RJ	Rio de Janeiro	Southeast	*5B,*5B	Slow
F07-RJ	Rio de Janeiro	Southeast	*4,*6A	Intermediate
F08-RJ	Rio de Janeiro	Southeast	*5A,*5B	Slow
F09-RJ	Rio de Janeiro	Southeast	*5B,*5B	Slow
F10-RJ	Rio de Janeiro	Southeast	*5B,*6A	Slow
F11-RJ	Rio de Janeiro	Southeast	*5B,*5B	Slow
F12-RJ	Rio de Janeiro	Southeast	*7B,*12Q	ND
002P-RJ	Rio de Janeiro	Southeast	*5B,*7B	Slow
004P-RJ	Rio de Janeiro	Southeast	*14B,*14H	Slow
005P-RJ	Rio de Janeiro	Southeast	*5B,*6H	Slow
006P-RJ	Rio de Janeiro	Southeast	*4,*6A	Intermediate
007P-RJ	Rio de Janeiro	Southeast	*6A,*6A	Slow
008P-RJ	Rio de Janeiro	Southeast	*5B,*5B	Slow
009P-RJ	Rio de Janeiro	Southeast	*4,*5B	Intermediate
010P-RJ	Rio de Janeiro	Southeast	*4,*14B	Rapid
011P-RJ	Rio de Janeiro	Southeast	*5B,*6A	Slow
015P-RJ	Rio de Janeiro	Southeast	*4,*6A	Intermediate
016P-RJ	Rio de Janeiro	Southeast	*4,*6A	Intermediate
017P-RJ	Rio de Janeiro	Southeast	*5B,*7B	Slow
019P-RJ	Rio de Janeiro	Southeast	*5B,*6A	Slow
020P-RJ	Rio de Janeiro	Southeast	*4,*6A	Intermediate
021-PRJ	Rio de Janeiro	Southeast	*6A,*6A	Slow
023P-RJ	Rio de Janeiro	Southeast	*5B,*5B	Slow
028P-RJ	Rio de Janeiro	Southeast	*4,*5B	Intermediate
029P-RJ	Rio de Janeiro	Southeast	*5B,*13A	Intermediate
030P-RJ	Rio de Janeiro	Southeast	*12R,*6A	ND
031P-RJ	Rio de Janeiro	Southeast	*6A,*6O	ND
032P-RJ	Rio de Janeiro	Southeast	*4,*6A	Intermediate
034P-RJ	Rio de Janeiro	Southeast	*5B,*5B	Slow
035P-RJ	Rio de Janeiro	Southeast	*4,*4	Rapid
038P-RJ	Rio de Janeiro	Southeast	*4,*5B	Intermediate
039P-RJ	Rio de Janeiro	Southeast	*5B,*6A	Slow
041P-RJ	Rio de Janeiro	Southeast	*6A,*6A	Slow
042P-RJ	Rio de Janeiro	Southeast	*7B,*6A	Slow
046P-RJ	Rio de Janeiro	Southeast	*5B,*6A	Slow
047P-RJ	Rio de Janeiro	Southeast	*4,*5B	Intermediate
048P-RJ	Rio de Janeiro	Southeast	*4,*5B	Intermediate
049P-RJ	Rio de Janeiro	Southeast	*4,*7B	Intermediate
050P-RJ	Rio de Janeiro	Southeast	*5B,*6A	Slow
051P-RJ	Rio de Janeiro	Southeast	*4,*5A	Intermediate
054P-RJ	Rio de Janeiro	Southeast	*4,*6A	Intermediate
055P-RJ	Rio de Janeiro	Southeast	*4,*12A	Rapid
056P-RJ	Rio de Janeiro	Southeast	*6A,*6A	Slow
057P-RJ	Rio de Janeiro	Southeast	*5B,*5B	Slow
058P-RJ	Rio de Janeiro	Southeast	*4,*5B	Intermediate
060P-RJ	Rio de Janeiro	Southeast	*13A,*6A	Intermediate
061P-RJ	Rio de Janeiro	Southeast	*6A,*6A	Slow
064P-RJ	Rio de Janeiro	Southeast	*4,*14B	Intermediate
065P-RJ	Rio de Janeiro	Southeast	*5C,*5B	Slow
066P-RJ	Rio de Janeiro	Southeast	*4,*6A	Intermediate
068P-RJ	Rio de Janeiro	Southeast	*5B,*5B	Slow
069P-RJ	Rio de Janeiro	Southeast	*5B,*5B	Slow
070P-RJ	Rio de Janeiro	Southeast	*5B,*6A	Slow
071P-RJ	Rio de Janeiro	Southeast	*5B,*5B	Slow
073P-RJ	Rio de Janeiro	Southeast	*5B,*5B	Slow
074P-RJ	Rio de Janeiro	Southeast	*12A,*5B	Intermediate
075P-RJ	Rio de Janeiro	Southeast	*4,*5B	Intermediate
076P-RJ	Rio de Janeiro	Southeast	*6P,*6A	ND
077P-RJ	Rio de Janeiro	Southeast	*4,*6A	Intermediate
078P-RJ	Rio de Janeiro	Southeast	*5B,*6A	Slow
079P-RJ	Rio de Janeiro	Southeast	*5B,*5B	Slow
081P-RJ	Rio de Janeiro	Southeast	*4,*5CA	ND
082P-RJ	Rio de Janeiro	Southeast	*5B,*6A	Slow
083P-RJ	Rio de Janeiro	Southeast	*4,*5B	Intermediate
086P-RJ	Rio de Janeiro	Southeast	*5B,*5B	Slow
088P-RJ	Rio de Janeiro	Southeast	*5B,*5B	Slow
089P-RJ	Rio de Janeiro	Southeast	*4,*14B	Intermediate
090P-RJ	Rio de Janeiro	Southeast	*4,*6A	Intermediate
091P-RJ	Rio de Janeiro	Southeast	*4,*6A	Intermediate
092P-RJ	Rio de Janeiro	Southeast	*5B,*6A	Slow
093P-RJ	Rio de Janeiro	Southeast	*5B,*7B	Slow
094P-RJ	Rio de Janeiro	Southeast	*5B,*6O	ND
097P-RJ	Rio de Janeiro	Southeast	*5B,*6A	Slow
098P-RJ	Rio de Janeiro	Southeast	*4,*5BA	ND
099P-RJ	Rio de Janeiro	Southeast	*5B,*5BA	ND
101P-RJ	Rio de Janeiro	Southeast	*4,*5B	Intermediate
102P-RJ	Rio de Janeiro	Southeast	*5B,*6A	Slow
103P-RJ	Rio de Janeiro	Southeast	*5B,*6A	Slow
104P-RJ	Rio de Janeiro	Southeast	*5B,*5B	Slow
105P-RJ	Rio de Janeiro	Southeast	*5B,*6A	Slow
106P-RJ	Rio de Janeiro	Southeast	*5C,*5B	Slow
107P-RJ	Rio de Janeiro	Southeast	*5B,*5B	Slow
PC01-RJ	Rio de Janeiro	Southeast	*12A,*12Q	ND
PC02-RJ	Rio de Janeiro	Southeast	*5B,*7B	Slow
PC03-RJ	Rio de Janeiro	Southeast	*4,*12A	Rapid
PC05-RJ	Rio de Janeiro	Southeast	*4,*5C	Intermediate
PC06-RJ	Rio de Janeiro	Southeast	*5B,*13A	Intermediate
PC07-RJ	Rio de Janeiro	Southeast	*5C,*6A	Slow
PC08-RJ	Rio de Janeiro	Southeast	*4,*7B	Intermediate
PC09-RJ	Rio de Janeiro	Southeast	*4,*13A	Rapid
PC10-RJ	Rio de Janeiro	Southeast	*5B,*13A	Intermediate
PC11-RJ	Rio de Janeiro	Southeast	*12A,*5C	Intermediate
PC12-RJ	Rio de Janeiro	Southeast	*4,*4	Rapid
PC13-RJ	Rio de Janeiro	Southeast	*4,*5B	Intermediate
PC14-RJ	Rio de Janeiro	Southeast	*5B,*13A	Intermediate
PC16-RJ	Rio de Janeiro	Southeast	*13A,*7B	Intermediate
PC17-RJ	Rio de Janeiro	Southeast	*4,*5B	Intermediate
PC18-RJ	Rio de Janeiro	Southeast	*5B,*13A	Intermediate
PC19-RJ	Rio de Janeiro	Southeast	*5B,*5B	Slow
PC21-RJ	Rio de Janeiro	Southeast	*4,*6A	Intermediate
PC22-RJ	Rio de Janeiro	Southeast	*13A,*13A	Rapid
PC23-RJ	Rio de Janeiro	Southeast	*4,*13A	Rapid
PC24-RJ	Rio de Janeiro	Southeast	*5B,*13A	Intermediate
PC25-RJ	Rio de Janeiro	Southeast	*4,*13A	Rapid
PC26-RJ	Rio de Janeiro	Southeast	*5B,*5B	Slow
PC27-RJ	Rio de Janeiro	Southeast	*4,*13A	Rapid
PC28-RJ	Rio de Janeiro	Southeast	*4,*12A	Rapid
PC29-RJ	Rio de Janeiro	Southeast	*4,*5B	Intermediate
PC30-RJ	Rio de Janeiro	Southeast	*6A,*14B	Slow
PC31-RJ	Rio de Janeiro	Southeast	*7B,*13H	ND
PC33-RJ	Rio de Janeiro	Southeast	*5B,*13A	Intermediate
PC34-RJ	Rio de Janeiro	Southeast	*4,*6A	Intermediate
PC35-RJ	Rio de Janeiro	Southeast	*13A,*6A	Intermediate
PC36-RJ	Rio de Janeiro	Southeast	*12A,*5B	Intermediate
PC38-RJ	Rio de Janeiro	Southeast	*5B,*13A	Intermediate
PC39-RJ	Rio de Janeiro	Southeast	*13A,*7B	Intermediate
PC40-RJ	Rio de Janeiro	Southeast	*5B,*6A	Slow
PC41-RJ	Rio de Janeiro	Southeast	*4,*4	Rapid
PC42-RJ	Rio de Janeiro	Southeast	*4,*5C	Intermediate
PC45-RJ	Rio de Janeiro	Southeast	*4,*5B	Intermediate
PC46-RJ	Rio de Janeiro	Southeast	*4,*13A	Rapid
PC47-RJ	Rio de Janeiro	Southeast	*4,*5BA	ND
PC48-RJ	Rio de Janeiro	Southeast	*4,*5B	Intermediate
PC49-RJ	Rio de Janeiro	Southeast	*13A,*7B	Intermediate
PC51-RJ	Rio de Janeiro	Southeast	*5C,*13A	Intermediate
PC52-RJ	Rio de Janeiro	Southeast	*13A,*13A	Rapid
PC53-RJ	Rio de Janeiro	Southeast	*13A,*14B	Intermediate
PC56-RJ	Rio de Janeiro	Southeast	*5B,*13A	Intermediate
PC57-RJ	Rio de Janeiro	Southeast	*4,*13A	Rapid
PC58-RJ	Rio de Janeiro	Southeast	*4,*13A	Rapid
PC59-RJ	Rio de Janeiro	Southeast	*13A,*7B	Intermediate
PC60-RJ	Rio de Janeiro	Southeast	*5B,*5B	Slow
PC61-RJ	Rio de Janeiro	Southeast	*13A,*13A	Rapid
PC62-RJ	Rio de Janeiro	Southeast	*5B,*13A	Intermediate
PC63-RJ	Rio de Janeiro	Southeast	*24,*13A	ND
PC64-RJ	Rio de Janeiro	Southeast	*4,*4	Rapid
PC65-RJ	Rio de Janeiro	Southeast	*4,*5B	Intermediate
PC66-RJ	Rio de Janeiro	Southeast	*4,*5B	Intermediate
PC67-RJ	Rio de Janeiro	Southeast	*4,*5B	Intermediate
PC68-RJ	Rio de Janeiro	Southeast	*12A,*13A	Rapid
PC70-RJ	Rio de Janeiro	Southeast	*5B,*5B	Slow
PC71-RJ	Rio de Janeiro	Southeast	*4,*5AA	ND
PC72-RJ	Rio de Janeiro	Southeast	*4,*5B	Intermediate
PC73-RJ	Rio de Janeiro	Southeast	*5B,*6A	Slow
PC74-RJ	Rio de Janeiro	Southeast	*12A,*13A	Rapid
PC75-RJ	Rio de Janeiro	Southeast	*5B,*7B	Slow
PC76-RJ	Rio de Janeiro	Southeast	*7B,*6A	Slow
PC77-RJ	Rio de Janeiro	Southeast	*5B,*5B	Slow
PC78-RJ	Rio de Janeiro	Southeast	*24,*13A	ND
PC79-RJ	Rio de Janeiro	Southeast	*5B,*5B	Slow
PC80-RJ	Rio de Janeiro	Southeast	*13A,*13A	Rapid
PC81-RJ	Rio de Janeiro	Southeast	*4,*6A	Intermediate
PC82-RJ	Rio de Janeiro	Southeast	*5B,*13A	Intermediate
PC83-RJ	Rio de Janeiro	Southeast	*5B,*13A	Intermediate
PC84-RJ	Rio de Janeiro	Southeast	*13A,*12E	ND
PC86-RJ	Rio de Janeiro	Southeast	*5B,*13A	Intermediate
PC88-RJ	Rio de Janeiro	Southeast	*4,*5B	Intermediate
PC89-RJ	Rio de Janeiro	Southeast	*13A,*7B	Intermediate
PC90-RJ	Rio de Janeiro	Southeast	*4,*13H	ND
PC91-RJ	Rio de Janeiro	Southeast	*5B,*5B	Slow
PC92-RJ	Rio de Janeiro	Southeast	*5B,*13A	Intermediate
PC93-RJ	Rio de Janeiro	Southeast	*13A,*14B	Intermediate
PC94-RJ	Rio de Janeiro	Southeast	*13A,*14B	Intermediate
PC95-RJ	Rio de Janeiro	Southeast	*4,*5B	Intermediate
PC96-RJ	Rio de Janeiro	Southeast	*4,*5B	Intermediate
PC97-RJ	Rio de Janeiro	Southeast	*4,*5B	Intermediate
PC98-RJ	Rio de Janeiro	Southeast	*4,*12A	Rapid
PC99-RJ	Rio de Janeiro	Southeast	*5B,*7B	Slow
PC100-RJ	Rio de Janeiro	Southeast	*5B,*6A	Slow
PC101-RJ	Rio de Janeiro	Southeast	*13F,*13D	ND
PC102-RJ	Rio de Janeiro	Southeast	*5B,*12B	Intermediate
PC105-RJ	Rio de Janeiro	Southeast	*6A,*6A	Slow
PC106-RJ	Rio de Janeiro	Southeast	*13A,*13A	Rapid
PC107-RJ	Rio de Janeiro	Southeast	*5B,*13A	Intermediate
PC108-RJ	Rio de Janeiro	Southeast	*4,*5B	Intermediate
PC109-RJ	Rio de Janeiro	Southeast	*5B,*5B	Slow
PC111-RJ	Rio de Janeiro	Southeast	*12A,*5B	Intermediate
PC113-RJ	Rio de Janeiro	Southeast	*13A,*12E	ND
PC114-RJ	Rio de Janeiro	Southeast	*5B,*13A	Intermediate
PC115-RJ	Rio de Janeiro	Southeast	*5B,*12E	ND
PC116-RJ	Rio de Janeiro	Southeast	*5B,*13D	ND
PC119-RJ	Rio de Janeiro	Southeast	*4,*13A	Rapid
PC120-RJ	Rio de Janeiro	Southeast	*4,*5B	Intermediate
PC121-RJ	Rio de Janeiro	Southeast	*12A,*5B	Intermediate
PC122-RJ	Rio de Janeiro	Southeast	*4,*13A	Rapid
PC124-RJ	Rio de Janeiro	Southeast	*13A,*13A	Rapid
PC127-RJ	Rio de Janeiro	Southeast	*5B,*14B	Slow
PC128-RJ	Rio de Janeiro	Southeast	*13A,*13A	Rapid
PC130-RJ	Rio de Janeiro	Southeast	*5B,*13A	Intermediate
PC132-RJ	Rio de Janeiro	Southeast	*5B,*14B	Slow
PC133-RJ	Rio de Janeiro	Southeast	*5B,*13A	Intermediate
PC134-RJ	Rio de Janeiro	Southeast	*4,*5B	Intermediate
PC136-RJ	Rio de Janeiro	Southeast	*5B,*13A	Intermediate
PC137-RJ	Rio de Janeiro	Southeast	*4,*13D	ND
PC139-RJ	Rio de Janeiro	Southeast	*5B,*13A	Intermediate
PC140-RJ	Rio de Janeiro	Southeast	*4,*13A	Rapid
PC141-RJ	Rio de Janeiro	Southeast	*5A,*5B	Slow
PC142-RJ	Rio de Janeiro	Southeast	*5B,*7B	Slow
PC144-RJ	Rio de Janeiro	Southeast	*13A,*13A	Rapid
PC145-RJ	Rio de Janeiro	Southeast	*5B,*13A	Intermediate
PC146-RJ	Rio de Janeiro	Southeast	*12A,*13A	Rapid
PC147-RJ	Rio de Janeiro	Southeast	*5B,*5B	Slow
PC148-RJ	Rio de Janeiro	Southeast	*4,*13A	Rapid
01P-CG	Rio de Janeiro	Southeast	*5B,*7B	Slow
02P-CG	Rio de Janeiro	Southeast	*5B,*5BA	ND
03P-CG	Rio de Janeiro	Southeast	*4,*6A	Intermediate
04P-CG	Rio de Janeiro	Southeast	*5B,*6A	Slow
05P-CG	Rio de Janeiro	Southeast	*5B,*5B	Slow
06P-CG	Rio de Janeiro	Southeast	*4,*5C	Intermediate
07P-CG	Rio de Janeiro	Southeast	*12A,*6A	Intermediate
08P-CG	Rio de Janeiro	Southeast	*4,*5B	Intermediate
09P-CG	Rio de Janeiro	Southeast	*12A,*6A	Intermediate
10P-CG	Rio de Janeiro	Southeast	*12A,*5B	Intermediate
11P-CG	Rio de Janeiro	Southeast	*5B,*6A	Slow
12P-CG	Rio de Janeiro	Southeast	*6A,*6A	Slow
13P-CG	Rio de Janeiro	Southeast	*4,*5B	Intermediate
14P-CG	Rio de Janeiro	Southeast	*4,*5B	Intermediate
15P-CG	Rio de Janeiro	Southeast	*5B,*5B	Slow
16P-CG	Rio de Janeiro	Southeast	*6A,*6O	ND
PC01-CG	Rio de Janeiro	Southeast	*5B,*5B	Slow
PC02-CG	Rio de Janeiro	Southeast	*5B,*6A	Slow
PC03-CG	Rio de Janeiro	Southeast	*5B,*13A	Intermediate
PC04-CG	Rio de Janeiro	Southeast	*5B,*7B	Slow
PC05-CG	Rio de Janeiro	Southeast	*12A,*14B	Intermediate
PC06-CG	Rio de Janeiro	Southeast	*4,*6A	Intermediate
PCO7-CG	Rio de Janeiro	Southeast	*5B,*5B	Slow
PC08-CG	Rio de Janeiro	Southeast	*5A,*6A	Slow
PC09-CG	Rio de Janeiro	Southeast	*5B,*14B	Slow
PC10-CG	Rio de Janeiro	Southeast	*4,*5B	Intermediate
PC11-CG	Rio de Janeiro	Southeast	*5B,*6A	Slow
PC12-CG	Rio de Janeiro	Southeast	*5B,*6A	Slow
PC13-CG	Rio de Janeiro	Southeast	*12A,*5B	Intermediate
PC14-CG	Rio de Janeiro	Southeast	*4,*6A	Intermediate
PC15-CG	Rio de Janeiro	Southeast	*5B,*5B	Slow
PC16-CG	Rio de Janeiro	Southeast	*12A,*6O	ND
PC17-CG	Rio de Janeiro	Southeast	*4,*6P	ND
PC18-CG	Rio de Janeiro	Southeast	*12A,*6A	Intermediate
PC19-CG	Rio de Janeiro	Southeast	*4,*13A	Rapid
PC20-CG	Rio de Janeiro	Southeast	*4,*5A	Intermediate
PC21-CG	Rio de Janeiro	Southeast	*5B,*6A	Slow
PC22-CG	Rio de Janeiro	Southeast	*12A,*7B	Intermediate
PC23-CG	Rio de Janeiro	Southeast	*4,*5B	Intermediate
PC24-CG	Rio de Janeiro	Southeast	*5D,*13H	ND
PC25-CG	Rio de Janeiro	Southeast	*5C,*5B	Slow
PC26-CG	Rio de Janeiro	Southeast	*5B,*6A	Slow
PC27-CG	Rio de Janeiro	Southeast	*13A,*6A	Intermediate
PC28-CG	Rio de Janeiro	Southeast	*4,*13A	Rapid
PC29-CG	Rio de Janeiro	Southeast	*4,*13A	Rapid
PC30-CG	Rio de Janeiro	Southeast	*5B,*6A	Slow
PC31-CG	Rio de Janeiro	Southeast	*5B,*5BA	ND
PC32-CG	Rio de Janeiro	Southeast	*4,*6A	Intermediate
PC33-CG	Rio de Janeiro	Southeast	*4,*5B	Intermediate
PC34-CG	Rio de Janeiro	Southeast	*5B,*6A	Slow
PC35-CG	Rio de Janeiro	Southeast	*5B,*6A	Slow
PC36-CG	Rio de Janeiro	Southeast	*4,*12G	ND
PC37-CG	Rio de Janeiro	Southeast	*5B,*5B	Slow
PC38-CG	Rio de Janeiro	Southeast	*5B,*5B	Slow
PC39-CG	Rio de Janeiro	Southeast	*5C,*5B	Slow
PC40-CG	Rio de Janeiro	Southeast	*4,*12A	Rapid
PC41-CG	Rio de Janeiro	Southeast	*5C,*5B	Slow
01P-VI	Espírito Santo	Southeast	*5B,*5B	Slow
02P-VI	Espírito Santo	Southeast	*5B,*14B	Slow
03P-VI	Espírito Santo	Southeast	*4,*5B	Intermediate
04P-VI	Espírito Santo	Southeast	*4,*5B	Intermediate
05P-VI	Espírito Santo	Southeast	*4,*5B	Intermediate
06P-VI	Espírito Santo	Southeast	*4,*5B	Intermediate
07P-VI	Espírito Santo	Southeast	*4,*5B	Intermediate
08P-VI	Espírito Santo	Southeast	*4,*4	Rapid
09P-VI	Espírito Santo	Southeast	*4,*4	Rapid
10P-VI	Espírito Santo	Southeast	*5B,*6A	Slow
11P-VI	Espírito Santo	Southeast	*7B,*6A	Slow
12P-VI	Espírito Santo	Southeast	*13A,*6A	Intermediate
13P-VI	Espírito Santo	Southeast	*5B,*5B	Slow
14P-VI	Espírito Santo	Southeast	*4,*5B	Intermediate
15P-VI	Espírito Santo	Southeast	*5B,*5B	Slow
16P-VI	Espírito Santo	Southeast	*5C,*5B	Slow
17P-VI	Espírito Santo	Southeast	*5B,*5B	Slow
18P-VI	Espírito Santo	Southeast	*4,*5B	Intermediate
19P-VI	Espírito Santo	Southeast	*4,*5B	Intermediate
20P-VI	Espírito Santo	Southeast	*4,*4	Rapid
21P-VI	Espírito Santo	Southeast	*4,*14A	Intermediate
22P-VI	Espírito Santo	Southeast	*5B,*5B	Slow
24P-VI	Espírito Santo	Southeast	*5B,*6A	Slow
25P-VI	Espírito Santo	Southeast	*6A,*6A	Slow
26P-VI	Espírito Santo	Southeast	*5B,*5B	Slow
27P-VI	Espírito Santo	Southeast	*5A,*7B	Slow
28P-VI	Espírito Santo	Southeast	*11A,*5B	Intermediate
29P-VI	Espírito Santo	Southeast	*4,*6A	Intermediate
30P-VI	Espírito Santo	Southeast	*5C,*5B	Slow
31P-VI	Espírito Santo	Southeast	*12H,*14A	ND
32P-VI	Espírito Santo	Southeast	*6A,*6A	Slow
33P-VI	Espírito Santo	Southeast	*5B,*6A	Slow
34P-VI	Espírito Santo	Southeast	*4,*4	Rapid
35P-VI	Espírito Santo	Southeast	*12P,*14B	ND
1C-VI	Espírito Santo	Southeast	*5B,*5B	Slow
2C-VI	Espírito Santo	Southeast	*5B,*5B	Slow
3C-VI	Espírito Santo	Southeast	*4,*6A	Intermediate
4C-VI	Espírito Santo	Southeast	*5B,*6A	Slow
5C-VI	Espírito Santo	Southeast	*6A,*14B	Slow
6C-VI	Espírito Santo	Southeast	*5B,*6A	Slow
7C-VI	Espírito Santo	Southeast	*6A,*6A	Slow
8C-VI	Espírito Santo	Southeast	*4,*6A	Intermediate
9C-VI	Espírito Santo	Southeast	*4,*5B	Intermediate
10C-VI	Espírito Santo	Southeast	*4,*4	Rapid
11C-VI	Espírito Santo	Southeast	*7B,*6A	Slow
12C-VI	Espírito Santo	Southeast	*12C,*6A	Intermediate
13C-VI	Espírito Santo	Southeast	*4,*4	Rapid
14C-VI	Espírito Santo	Southeast	*4,*6A	Intermediate
15C-VI	Espírito Santo	Southeast	*5C,*5B	Slow
16C-VI	Espírito Santo	Southeast	*4,*6A	Intermediate
17C-VI	Espírito Santo	Southeast	*4,*6A	Intermediate
18C-VI	Espírito Santo	Southeast	*4,*7B	Intermediate
19C-VI	Espírito Santo	Southeast	*5B,*6A	Slow
20C-VI	Espírito Santo	Southeast	*4,*4	Rapid
21C-VI	Espírito Santo	Southeast	*4,*4	Rapid
22C-VI	Espírito Santo	Southeast	*5B,*7B	Slow
23C-VI	Espírito Santo	Southeast	*4,*5B	Intermediate
24C-VI	Espírito Santo	Southeast	*4,*5B	Intermediate
25C-VI	Espírito Santo	Southeast	*4,*4	Rapid
26C-VI	Espírito Santo	Southeast	*4,*12A	Rapid
27C-VI	Espírito Santo	Southeast	*5B,*6A	Slow
28C-VI	Espírito Santo	Southeast	*4,*5B	Intermediate
29C-VI	Espírito Santo	Southeast	*5B,*6A	Slow
30C-VI	Espírito Santo	Southeast	*5B,*6A	Slow
31C-VI	Espírito Santo	Southeast	*5B,*6A	Slow
32C-VI	Espírito Santo	Southeast	*4,*5B	Intermediate
33C-VI	Espírito Santo	Southeast	*12C,*6A	Intermediate
34C-VI	Espírito Santo	Southeast	*5B,*5B	Slow
36C-VI	Espírito Santo	Southeast	*12C,*6A	Intermediate
01C-Cu	Paraná	South	*6A,*5AA	ND
02C-Cu	Paraná	South	*5B,*5B	Slow
03C-Cu	Paraná	South	*5C,*5BA	ND
04C-Cu	Paraná	South	*4,*5B	Intermediate
06C-Cu	Paraná	South	*4,*5B	Intermediate
07C-Cu	Paraná	South	*5B,*5B	Slow
08C-Cu	Paraná	South	*5B,*5B	Slow
09C-Cu	Paraná	South	*4,*5B	Intermediate
10C-Cu	Paraná	South	*5B,*5B	Slow
2	Rio Grande do Sul	South	*5B,*5B	Slow
5	Rio Grande do Sul	South	*12A,*5C	Intermediate
7	Rio Grande do Sul	South	*5B,*12B	Intermediate
17	Rio Grande do Sul	South	*4,*13A	Rapid
21	Rio Grande do Sul	South	*5B,*6A	Slow
23	Rio Grande do Sul	South	*7A,*7B	Slow
26	Rio Grande do Sul	South	*5B,*5B	Slow
32	Rio Grande do Sul	South	*12A,*12A	Rapid
33	Rio Grande do Sul	South	*6A,*6A	Slow
36	Rio Grande do Sul	South	*12C,*13A	Rapid
40	Rio Grande do Sul	South	*4,*5B	Intermediate
41	Rio Grande do Sul	South	*12A,*13A	Rapid
45	Rio Grande do Sul	South	*12A,*12C	Rapid
46	Rio Grande do Sul	South	*4,*6A	Intermediate
50	Rio Grande do Sul	South	*5B,*7B	Slow
53	Rio Grande do Sul	South	*4,*12A	Rapid
56	Rio Grande do Sul	South	*4,*5B	Intermediate
57	Rio Grande do Sul	South	*5B,*5B	Slow
58	Rio Grande do Sul	South	*4,*13A	Rapid
59	Rio Grande do Sul	South	*12A,*12A	Rapid
63	Rio Grande do Sul	South	*4,*13A	Rapid
64	Rio Grande do Sul	South	*5A,*5A	Slow
67	Rio Grande do Sul	South	*4,*4	Rapid
70	Rio Grande do Sul	South	*4,*5B	Intermediate
71	Rio Grande do Sul	South	*4,*13A	Rapid
75	Rio Grande do Sul	South	*5B,*7B	Slow
76	Rio Grande do Sul	South	*4,*13A	Rapid
77	Rio Grande do Sul	South	*5B,*13A	Intermediate
78	Rio Grande do Sul	South	*5B,*6A	Slow
79	Rio Grande do Sul	South	*5B,*5B	Slow
80	Rio Grande do Sul	South	*12A,*5B	Intermediate
81	Rio Grande do Sul	South	*5B,*5B	Slow
82	Rio Grande do Sul	South	*5B,*5B	Slow
83	Rio Grande do Sul	South	*5B,*5B	Slow
84	Rio Grande do Sul	South	*12A,*12A	Rapid
87	Rio Grande do Sul	South	*5B,*5B	Slow
89	Rio Grande do Sul	South	*5B,*12B	Intermediate
91	Rio Grande do Sul	South	*5B,*6A	Slow
94	Rio Grande do Sul	South	*4,*6A	Intermediate
96	Rio Grande do Sul	South	*12A,*5B	Intermediate
98	Rio Grande do Sul	South	*12A,*12C	Rapid
99	Rio Grande do Sul	South	*6A,*6A	Slow
100	Rio Grande do Sul	South	*12A,*12A	Rapid
101	Rio Grande do Sul	South	*6A,*6A	Slow
102	Rio Grande do Sul	South	*5A,*6A	Slow
103	Rio Grande do Sul	South	*5B,*6A	Slow
104	Rio Grande do Sul	South	*5B,*6A	Slow
106	Rio Grande do Sul	South	*4,*4	Rapid
108	Rio Grande do Sul	South	*5B,*12B	Intermediate
109	Rio Grande do Sul	South	*4,*4	Rapid
111	Rio Grande do Sul	South	*5D,*5J	Slow
114	Rio Grande do Sul	South	*4,*4	Rapid
115	Rio Grande do Sul	South	*5B,*5B	Slow
117	Rio Grande do Sul	South	*6A,*6A	Slow
119	Rio Grande do Sul	South	*4,*4	Rapid
120	Rio Grande do Sul	South	*6A,*6A	Slow
126	Rio Grande do Sul	South	*5B,*5B	Slow
127	Rio Grande do Sul	South	*4,*6A	Intermediate
131	Rio Grande do Sul	South	*5A,*6A	Slow
132	Rio Grande do Sul	South	*12A,*6A	Intermediate
133	Rio Grande do Sul	South	*5B,*6A	Slow
136	Rio Grande do Sul	South	*12A,*5B	Intermediate
137	Rio Grande do Sul	South	*4,*7B	Intermediate
140	Rio Grande do Sul	South	*12A,*5B	Intermediate
141	Rio Grande do Sul	South	*12A,*12A	Rapid
142	Rio Grande do Sul	South	*12A,*5C	Intermediate
143	Rio Grande do Sul	South	*12A,*5B	Intermediate
144	Rio Grande do Sul	South	*4,*4	Rapid
145	Rio Grande do Sul	South	*5B,*12B	Intermediate
146	Rio Grande do Sul	South	*6A,*6A	Slow
148	Rio Grande do Sul	South	*5C,*12B	Intermediate
150	Rio Grande do Sul	South	*13A,*13A	Rapid
151	Rio Grande do Sul	South	*4,*4	Rapid
155	Rio Grande do Sul	South	*6A,*6A	Slow
156	Rio Grande do Sul	South	*12A,*5C	Intermediate
157	Rio Grande do Sul	South	*12A,*5C	Intermediate
158	Rio Grande do Sul	South	*5B,*12M	ND
159	Rio Grande do Sul	South	*12A,*12A	Rapid
162	Rio Grande do Sul	South	*5A,*5B	Slow
165	Rio Grande do Sul	South	*12A,*5B	Intermediate
166	Rio Grande do Sul	South	*5B,*5B	Slow
167	Rio Grande do Sul	South	*5B,*5B	Slow
168	Rio Grande do Sul	South	*5B,*5B	Slow
171	Rio Grande do Sul	South	*6A,*6A	Slow
174	Rio Grande do Sul	South	*5B,*5B	Slow
175	Rio Grande do Sul	South	*12A,*12B	Rapid
176	Rio Grande do Sul	South	*4,*5D	Intermediate
177	Rio Grande do Sul	South	*4,*4	Rapid
178	Rio Grande do Sul	South	*12A,*5C	Intermediate
180	Rio Grande do Sul	South	*4,*4	Rapid
181	Rio Grande do Sul	South	*12A,*5B	Intermediate
183	Rio Grande do Sul	South	*12A,*12A	Rapid
184	Rio Grande do Sul	South	*5B,*5B	Slow
187	Rio Grande do Sul	South	*12A,*5B	Intermediate
188	Rio Grande do Sul	South	*12A,*12A	Rapid
189	Rio Grande do Sul	South	*12A,*5C	Intermediate
190	Rio Grande do Sul	South	*12A,*12B	Rapid
191	Rio Grande do Sul	South	*5D,*5D	Slow
192	Rio Grande do Sul	South	*6A,*6A	Slow
193	Rio Grande do Sul	South	*12A,*12A	Rapid
195	Rio Grande do Sul	South	*4,*13A	Rapid
196	Rio Grande do Sul	South	*5B,*12B	Intermediate
197	Rio Grande do Sul	South	*12A,*5B	Intermediate
198	Rio Grande do Sul	South	*12C,*12C	Rapid
200	Rio Grande do Sul	South	*4,*4	Rapid
201	Rio Grande do Sul	South	*4,*13A	Rapid
202	Rio Grande do Sul	South	*13A,*13A	Rapid
205	Rio Grande do Sul	South	*6A,*6A	Slow
207	Rio Grande do Sul	South	*4,*13A	Rapid
209	Rio Grande do Sul	South	*5B,*12B	Intermediate
210	Rio Grande do Sul	South	*12A,*12B	Rapid
211	Rio Grande do Sul	South	*4,*13A	Rapid
212	Rio Grande do Sul	South	*4,*13A	Rapid
213	Rio Grande do Sul	South	*5B,*5B	Slow
217	Rio Grande do Sul	South	*12A,*12B	Rapid
218	Rio Grande do Sul	South	*5C,*5C	Slow
221	Rio Grande do Sul	South	*12A,*5B	Intermediate
223	Rio Grande do Sul	South	*4,*13A	Rapid
224	Rio Grande do Sul	South	*12A,*12A	Rapid
225	Rio Grande do Sul	South	*6A,*6A	Slow
226	Rio Grande do Sul	South	*6A,*6A	Slow
227	Rio Grande do Sul	South	*4,*4	Rapid
228	Rio Grande do Sul	South	*5B,*12B	Intermediate
229	Rio Grande do Sul	South	*6A,*6A	Slow
230	Rio Grande do Sul	South	*12A,*12B	Rapid
231	Rio Grande do Sul	South	*12A,*12A	Rapid
232	Rio Grande do Sul	South	*12A,*12B	Rapid
233	Rio Grande do Sul	South	*12A,*5B	Intermediate
235	Rio Grande do Sul	South	*12A,*5C	Intermediate
236	Rio Grande do Sul	South	*12A,*12B	Rapid
237	Rio Grande do Sul	South	*12A,*12B	Rapid
238	Rio Grande do Sul	South	*12A,*5B	Intermediate
239	Rio Grande do Sul	South	*12B,*5T	ND
240	Rio Grande do Sul	South	*4,*13A	Rapid
241	Rio Grande do Sul	South	*4,*4	Rapid
242	Rio Grande do Sul	South	*4,*13A	Rapid
243	Rio Grande do Sul	South	*12A,*12A	Rapid
244	Rio Grande do Sul	South	*12A,*5B	Intermediate
245	Rio Grande do Sul	South	*6A,*6A	Slow
252	Rio Grande do Sul	South	*4,*13A	Rapid
253	Rio Grande do Sul	South	*13A,*13A	Rapid
254	Rio Grande do Sul	South	*5B,*12B	Intermediate
255	Rio Grande do Sul	South	*13A,*13A	Rapid
256	Rio Grande do Sul	South	*12A,*5B	Intermediate
257	Rio Grande do Sul	South	*12A,*12A	Rapid
258	Rio Grande do Sul	South	*12A,*12A	Rapid
260	Rio Grande do Sul	South	*12A,*12B	Rapid
263	Rio Grande do Sul	South	*4,*13A	Rapid
264	Rio Grande do Sul	South	*12A,*12A	Rapid
265	Rio Grande do Sul	South	*13A,*13A	Rapid
267	Rio Grande do Sul	South	*4,*4	Rapid
268	Rio Grande do Sul	South	*5C,*12B	Intermediate
269	Rio Grande do Sul	South	*5B,*5B	Slow
270	Rio Grande do Sul	South	*4,*13A	Rapid
272	Rio Grande do Sul	South	*5B,*12B	Intermediate
273	Rio Grande do Sul	South	*4,*13A	Rapid
274	Rio Grande do Sul	South	*12A,*5B	Intermediate
275	Rio Grande do Sul	South	*12A,*12A	Rapid
276	Rio Grande do Sul	South	*4,*13A	Rapid
278	Rio Grande do Sul	South	*7A,*7B	Slow
280	Rio Grande do Sul	South	*5B,*12B	Intermediate
281	Rio Grande do Sul	South	*12A,*12A	Rapid
282	Rio Grande do Sul	South	*5B,*12B	Intermediate
283	Rio Grande do Sul	South	*5B,*12B	Intermediate
284	Rio Grande do Sul	South	*5B,*12B	Intermediate
286	Rio Grande do Sul	South	*12A,*5B	Intermediate
287	Rio Grande do Sul	South	*4,*5D	Intermediate
288	Rio Grande do Sul	South	*5B,*5B	Slow
289	Rio Grande do Sul	South	*4,*13A	Rapid
290	Rio Grande do Sul	South	*4,*13A	Rapid
291	Rio Grande do Sul	South	*12A,*12C	Rapid
293	Rio Grande do Sul	South	*12A,*12C	Rapid
294	Rio Grande do Sul	South	*5B,*12B	Intermediate
296	Rio Grande do Sul	South	*5C,*7C	Slow
297	Rio Grande do Sul	South	*6A,*6A	Slow
298	Rio Grande do Sul	South	*13A,*13A	Rapid
299	Rio Grande do Sul	South	*12A,*12A	Rapid
301	Rio Grande do Sul	South	*5B,*12B	Intermediate
302	Rio Grande do Sul	South	*5B,*12B	Intermediate
303	Rio Grande do Sul	South	*12A,*5C	Intermediate
304	Rio Grande do Sul	South	*12A,*5B	Intermediate
305	Rio Grande do Sul	South	*12A,*5B	Intermediate
306	Rio Grande do Sul	South	*5B,*12B	Intermediate
307	Rio Grande do Sul	South	*5B,*12B	Intermediate
308	Rio Grande do Sul	South	*12A,*5B	Intermediate
309	Rio Grande do Sul	South	*4,*13A	Rapid
310	Rio Grande do Sul	South	*4,*13A	Rapid
311	Rio Grande do Sul	South	*5B,*5B	Slow
312	Rio Grande do Sul	South	*12A,*5B	Intermediate
313	Rio Grande do Sul	South	*4,*13A	Rapid
317	Rio Grande do Sul	South	*5B,*12B	Intermediate
318	Rio Grande do Sul	South	*12A,*12B	Rapid
321	Rio Grande do Sul	South	*12A,*5B	Intermediate
323	Rio Grande do Sul	South	*12A,*5B	Intermediate
325	Rio Grande do Sul	South	*12A,*12A	Rapid
326	Rio Grande do Sul	South	*4,*5D	Intermediate
327	Rio Grande do Sul	South	*5C,*12B	Intermediate
328	Rio Grande do Sul	South	*12A,*5B	Intermediate
329	Rio Grande do Sul	South	*13A,*13A	Rapid
330	Rio Grande do Sul	South	*12A,*5B	Intermediate
331	Rio Grande do Sul	South	*12A,*12A	Rapid
332	Rio Grande do Sul	South	*12A,*5B	Intermediate
334	Rio Grande do Sul	South	*5B,*12B	Intermediate
335	Rio Grande do Sul	South	*12A,*5B	Intermediate
336	Rio Grande do Sul	South	*5B,*12B	Intermediate
337	Rio Grande do Sul	South	*4,*5D	Intermediate
339	Rio Grande do Sul	South	*12A,*12A	Rapid
341	Rio Grande do Sul	South	*4,*4	Rapid
343	Rio Grande do Sul	South	*4,*4	Rapid
346	Rio Grande do Sul	South	*12A,*12A	Rapid
348	Rio Grande do Sul	South	*12C,*12C	Rapid
349	Rio Grande do Sul	South	*12A,*5C	Intermediate
350	Rio Grande do Sul	South	*5C,*12B	Intermediate
354	Rio Grande do Sul	South	*5B,*5B	Slow
355	Rio Grande do Sul	South	*13A,*13A	Rapid
356	Rio Grande do Sul	South	*12A,*5C	Intermediate
359	Rio Grande do Sul	South	*5D,*5D	Slow
361	Rio Grande do Sul	South	*5C,*12B	Intermediate
362	Rio Grande do Sul	South	*6F,*5C	ND
363	Rio Grande do Sul	South	*4,*4	Rapid
365	Rio Grande do Sul	South	*12A,*12B	Rapid
366	Rio Grande do Sul	South	*5B,*5B	Slow
367	Rio Grande do Sul	South	*5C,*12B	Intermediate
369	Rio Grande do Sul	South	*5B,*5G	Slow
370	Rio Grande do Sul	South	*12A,*5B	Intermediate
371	Rio Grande do Sul	South	*4,*5D	Intermediate
372	Rio Grande do Sul	South	*12A,*5B	Intermediate
374	Rio Grande do Sul	South	*5C,*5C	Slow
377	Rio Grande do Sul	South	*13A,*7B	Intermediate
378	Rio Grande do Sul	South	*5B,*5B	Slow
379	Rio Grande do Sul	South	*12A,*5C	Intermediate
380	Rio Grande do Sul	South	*6A,*6A	Slow
381	Rio Grande do Sul	South	*4,*13A	Rapid
382	Rio Grande do Sul	South	*12A,*12B	Rapid
383	Rio Grande do Sul	South	*6A,*6A	Slow
387	Rio Grande do Sul	South	*5B,*12B	Intermediate
388	Rio Grande do Sul	South	*5C,*12B	Intermediate
389	Rio Grande do Sul	South	*6A,*6A	Slow
391	Rio Grande do Sul	South	*4,*5D	Intermediate
				ND = not determined
